# Supplementary material for: The diversification and potential function of microbiome in sediment-water interface of methane seeps in South China Sea
Source: Frontiers journal article supplement (doi:10.3389/fmicb.2024.1287147), 2024-02-06
Supplement: Data_Sheet_1.pdf [file Data_Sheet_1.pdf]

# The diversification and potential function of microbiome in sediment-water interface of methane seeps in South China Sea

## Figures

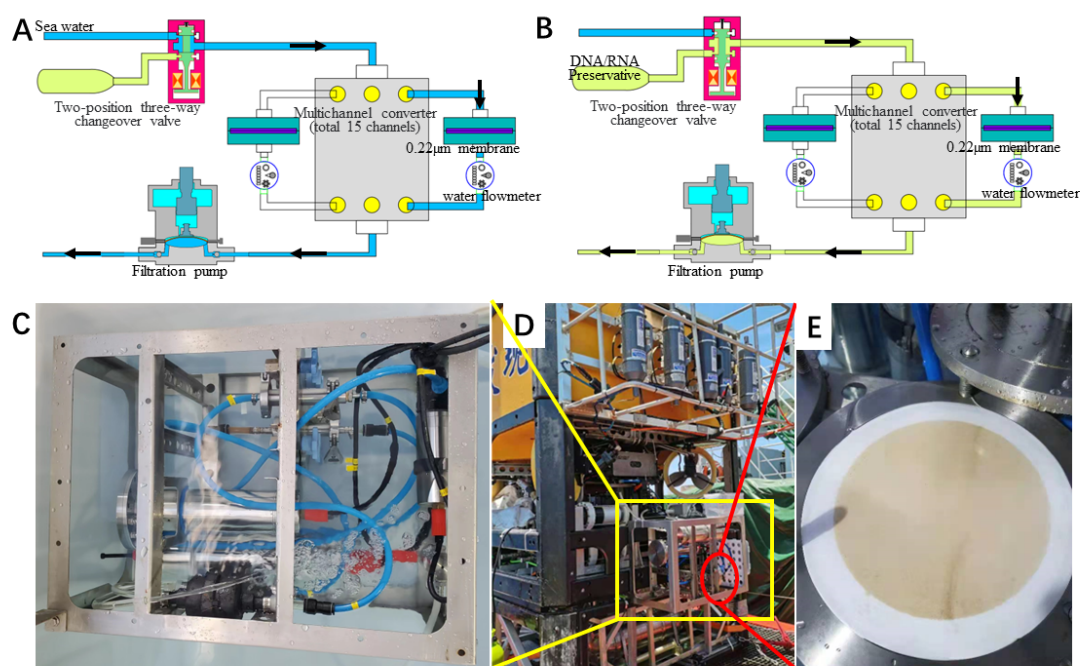

Fig. S1 Large-volume *In-situ* Filtration Equipment (LIFE) (an experimental instrument designed by our group).

(A). Schematic structure and workflow diagram of LIFE apparatus. Seawater was pumped into the filtration chamber;

(B). DNA/RNA preservative (DNA extraction buffer or RNALater solution) was injected into the chamber with filtered microbes for *in situ* preservation;

(C). Filtration pump equipped at the end of the filtration system can stop the backward flow of seawater into the filter. The arrow directions in A and B indicate the liquid directions. The LIFE was undergoing underwater commissioning;

(D). The LIFE was equipped on the ROV *Faxian* along with Niskin bottles;

(E). When the ROV *Faxian* travelled back on the deck, the membrane in the filtration chamber was picked out immediately, quick-frozen with liquid nitrogen then stored at -80 °C.

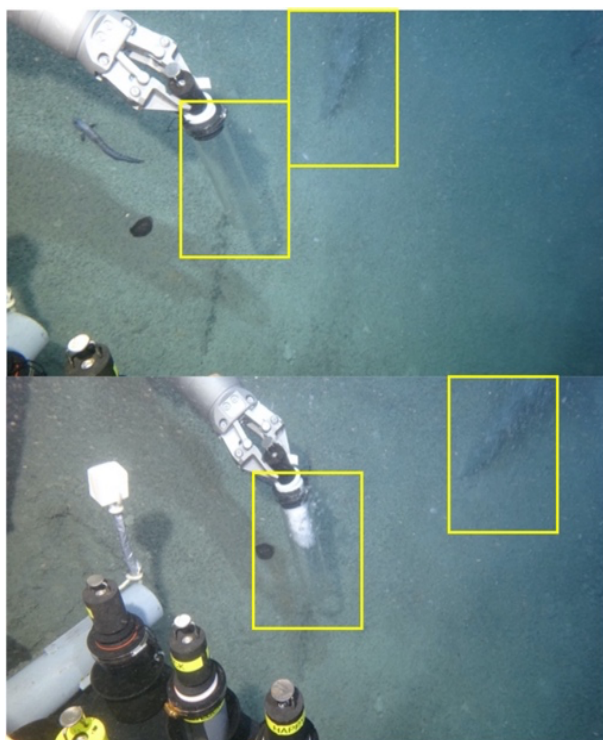

Fig. S2 Pushcore collection and accumulation of combustible ice (these pictures scattered by ROV *Faxian* Dive 252. The first picture was scattered on 12:14:40, 2021.5.28, the second was at 12:17:55, 2021.5.28. In only ~3 mins, combustible ice hydrates were accumulated at the top of pushcore in serial-shot photos).

Methane transducer is designed to measure methane concentrations, whose range is between 100nM and 50 $\mu$ M, with a resolution of 10nM. To ensure the integrity and precision of the instrument, when the *Faxian* ROV travelling in Lingshui seepage area, the transducer was off the charts. As a result, methane concentrations in Lingshui were not acquired. It is worth noting that methane gas bubbles were occasionally observed in Site F, while in Lingshui, methane gas was erupting continuously. And in a series of consecutively taken photographs, gas hydrate formed and accumulated at the top of pushcore (25cm in length) to a height of approximately 10cm in only ~3mins, indicating a high methane concentration in Lingshui.

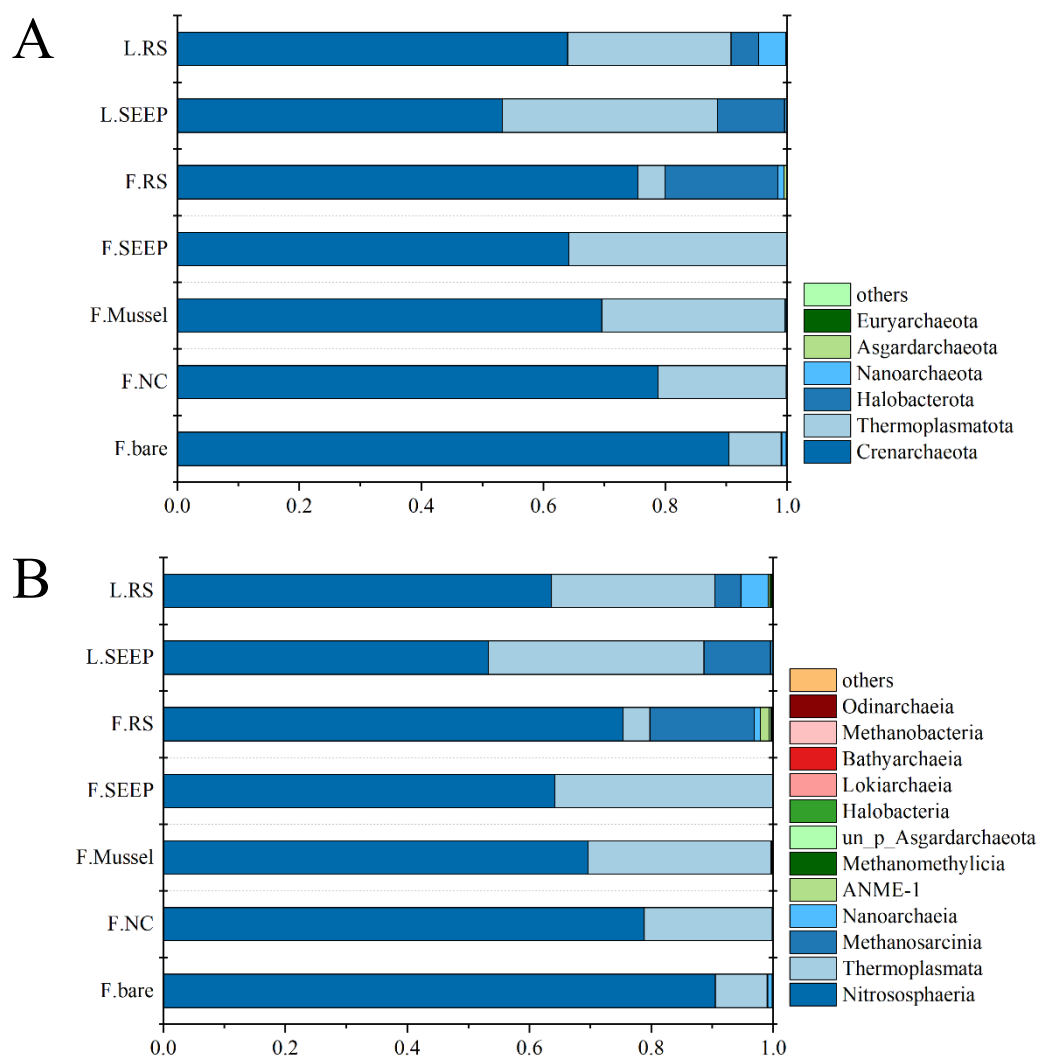

Fig. S3 Archaeal community in cold seep environment in phylum (A) and class (B) level

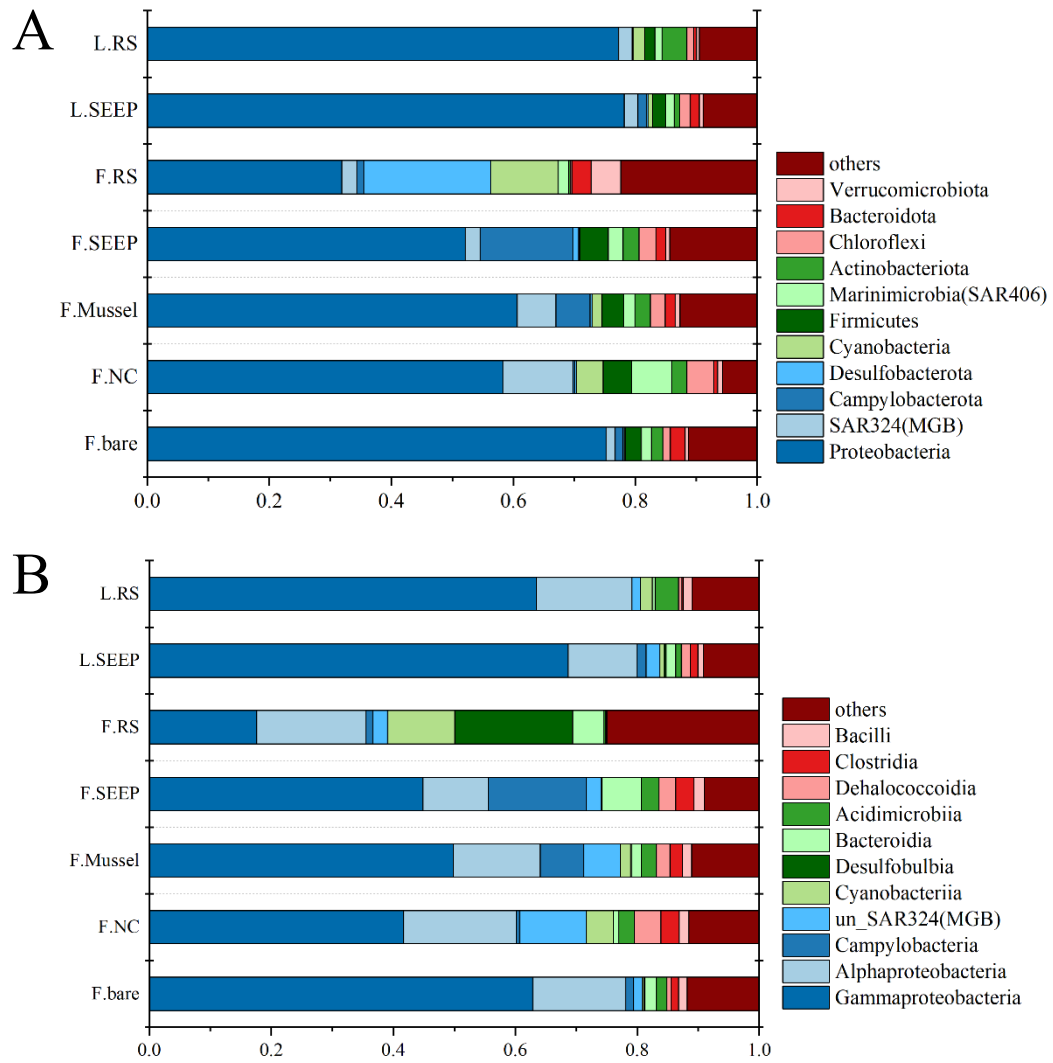

Fig. S4 Bacterial community in cold seep environment in phylum (A) and class (B) level

## Tables

Table S1 archaea and bacteria 16S rRNA genes primers set procedure and protocol

| genes                            | sequences                                                                      | procedure                                                                                                                                                     | references                                |
|----------------------------------|--------------------------------------------------------------------------------|---------------------------------------------------------------------------------------------------------------------------------------------------------------|-------------------------------------------|
| Archaeal 16S rRNA gene (288 bp)  | U519F (5'- CAG YMG CCR CGG KAA HAC C)<br>806R (5'- GGA CTA CHV GGG TWT CTA AT) | Initially denatured at 95°C for 2 min; then amplified using 30 cycles of 95°C for 15s, 55°C for 30s, and 68°C for 45s; with final extension of 3 min at 68°C. | (Porat et al., 2010; Shehab et al., 2013) |
| Bacterial 16S rRNA gene (446 bp) | 338F (5'- ACT CCT ACG GGA GGC AGC AG)<br>806R (5'- GGA CTA CHV GGG TWT CTA AT) | Initial denaturation at 95 °C for 2 min, followed by 30 cycles of denaturation at 95 °C for 30s, annealing at 53 °C for 20s, and elongation at 72 °C for 60s. | (Peiffer et al., 2013)                    |

Table S2 Environmental characteristics of surface layer of different micro-boundary in cold seep

| Sampling location                   | L_SEEP            | L_RS  | F_SEEP  | F_RS     | F_NC   | F_Mussel | F_Bare |
|-------------------------------------|-------------------|-------|---------|----------|--------|----------|--------|
| Sampling time                       | 2021              | 2021  | 2020    | 2020     | 2021   | 2021     | 2021   |
| temp (°C)                           | 2.56              | 2.56  | 3.59    | 3.63     | 3.65   | 3.69     | 3.22   |
| CH <sub>4</sub> (μM)                | >50* <sup>1</sup> | NA    | 8.10    | 0.055    | 0.38   | 1.58     | 0.33   |
| DO (mg/L)                           | 2.4               | NA    | 0.6-3.5 | 3.22     | 3.2    | 0.5-3.0  | 3.29   |
| DIC (mM)                            | -                 | -     | 1.93    | 1.55     | 1.59   | -        | -      |
| DI <sup>13</sup> C (‰)              | -                 | -     | -3.4    | -2       | -1.6   | -        | -      |
| DOC (mM)                            |                   |       | 0.24    | 15.20    | 0.14   |          |        |
| DO <sup>13</sup> C (‰)              | -                 | -     | -25.63  | -14.46   | -28.21 | -        | -      |
| NO <sub>2</sub> <sup>-</sup> (μM)   | 0.59              | 0.46  | 7.646   | 0.759    | 0.35   | 0.38     | 0.43   |
| NO <sub>3</sub> <sup>-</sup> (μM)   | 30.2              | 29.73 | 17.365  | 10.608   | 24.2   | 22.32    | 24.31  |
| NH <sub>4</sub> <sup>+</sup> (μM)   | 1.93              | 1.95  | 105.374 | 4323.895 | 1.15   | 3.37     | 2.65   |
| PO <sub>4</sub> <sup>3-</sup> (μM)  | 2.48              | 2.77  | 18.25   | 38.892   | 2.22   | 1.96     | 1.93   |
| SO <sub>4</sub> <sup>2-</sup> (mM)* | 28                | 28    | 28      | 28       | 28     | 28       | 28     |

\*SO<sub>4</sub><sup>2-</sup> Take the high sulfate concentration-28 mM- in seawater as the environment background value, which makes it the most abundant and, often, important electron acceptor at cold seeps (Joye 2020).

The DOC and inorganic nutrients possibly sourced from deep fluids associated with CH<sub>4</sub> seepage. The range of ammonium in Site F was ranging from 1.15 to 4.12 μmol/L, while the Lingshui cold seep was relatively stable, approximately remaining at ~1.95 μmol/L. The nitrite concentration of Site F was 0.32~0.43 μmol/L, the nitrite concentration in Lingshui detected micro area, L\_SEEP and L\_RS, was higher than that of Site F, which was 0.46~0.59 μmol/L. In Site F, nitrate with a high level at 20.82~24.31 μmol/L, which was significantly higher than that of nitrite. The nitrate in Lingshui was about ~30 μmol/L, higher than that of Site F. The total organic nitrogen (TON) in Site F (21.14~24.74 μmol/L) was lower than that of Lingshui (30.19~30.79 μmol/L). The concentration trend of silicate and phosphate was also consistent with that of TON, and the Site F was lower than that of Lingshui.

Table S3 Diversity Characteristics of archaeal/bacterial-16S rRNA genes

| Sample Sites | Sequences<br>(archaea/bacteria) | OTUs<br>(archaea/bacteria) | Chao1<br>(archaea/bacteria) | Shannon<br>(archaea/bacteria) | Coverage(%)<br>(archaea/bacteria) |
|--------------|---------------------------------|----------------------------|-----------------------------|-------------------------------|-----------------------------------|
| L_SEEP       | 25766/45255                     | 175/843                    | 213.71/922.16               | 4.71/6.39                     | 99.92/99.81                       |
| L_RS         | 22001/47188                     | 97/630                     | 110.00/658.05               | 4.89/5.88                     | 100.00/99.92                      |
| F_SEEP       | 39320/24137                     | 125/537                    | 119.44/1123.50              | 3.70/6.39                     | 99.97/99.84                       |
| F_RS         | 32288/22554                     | 284/275                    | 311.76/275.00               | 4.29/5.48                     | 99.91/100.00                      |
| F_Mussel     | 33881/31989                     | 175/880                    | 192.60/960.71               | 4.37/7.15                     | 99.93/99.86                       |
| F_NC         | 37448/33851                     | 118/577                    | 124.18/624.53               | 3.57/6.27                     | 99.96/99.90                       |
| F_bare       | 38939/36867                     | 177/849                    | 190.24/976.77               | 4.18/6.58                     | 99.93/99.87                       |
